# Supplementary material
Source: PubMed Central journal article supplement (PMC9662888)
Supplement: ccr-21-4543_supplementary_data_ds1_suppds1.pdf [file ccr-21-4543_supplementary_data_ds1_suppds1.pdf]

## Supplementary Methods

### Immunohistochemistry

Primary antibodies S100 (Dako Omnis GA50461-2, 1:2), cytokeratin AE1/AE3 (EMD Millipore, IHCR2025-6, 1:6), and myelin basic protein (MBP, Cell Signaling #78896, 1:1200) were incubated for 2h at room temperature. Mouse (X0931) or rabbit IgG (X0936, both Dako) were used as negative controls (2  $\mu$ g/mL). Antigen retrieval was performed with citrate buffer pH 6.0. Epitope blocking was with 1% bovine serum albumin in 1x phosphate buffered saline (1h, room temperature). Secondary antibody reactions were with streptavidin-biotin complex, including biotinylated goat anti-rabbit IgG (#GR602H), biotinylated goat anti-mouse IgG (#GM601H), streptavidin HRP Label (#HP604H), and 3,3'-Diaminobenzidine (DAB) chromogen (#DB801R, all from Biocare Medical). Slides were counterstained with Mayer's hematoxylin.

### Cell culture and qPCR

50B11 cells were cultured in Neurobasal medium (Gibco, #21103-049) supplemented with 10% FBS (Gibco, #10082-147), B27 supplement (18  $\mu$ l/ml, Gibco, #17504-044), 20% glucose (10  $\mu$ l/ml, Sigma, #G-7520), 200 mM L-Glutamine (2.49  $\mu$ l/ml, ATCC, #30-2214), and 1% Penicillin/Streptomycin (Gibco, #15140-122). S16 cells were cultured in DMEM (ATCC, #30-2002), supplemented with 10% FBS and 5% Penicillin/Streptomycin. ATCC cells were genotyped at the vendor.

UM-SCC-29 (from T. Carey, University of Michigan, genotyped at our laboratory) was used to generate cancer conditioned medium as follows: cells were plated in a 100 mm dish at 1.2 million cells per dish in DMEM (Gibco, #11965-092) supplemented with 10% FBS and 1% Penicillin/Streptomycin for 24h. Cells were washed once in either blank DMEM (#30-2002) or blank Neurobasal medium (Gibco, #21103049) and incubated with 5 mL of blank medium for 16h to generate conditioned medium. 50B11 and S16 cells were plated at 0.7 million cells per dish in their corresponding medium described above. After 24h, cells were washed once and incubated in blank medium for 16h. UM-SCC-29 conditioned medium was collected and centrifuged at 10,000 rpm for 10 minutes at 4°C, and applied to 50B11 and

S16 cells for 6, 10, 24, and 48h. For 50B11 cells, supplements B27, glucose and L-glutamine were added to the conditioned medium. Cells were harvested in QIAzol (QIAGEN, #79306).

Dorsal root ganglia (DRG) co-culture experiments were performed as follows. UM-SCC-29 cells were plated in a 24-well plate using DMEM complete medium, 4 wells per time point, at the designated numbers:  $6 \times 10^4$ ,  $5 \times 10^4$ , and  $4 \times 10^4$  for 24, 48, and 72h, respectively. Medium was also added to control blank wells. One day after plating, 48 DRGs from one 9 week-old female rat (Charles River Sprague Dawley rat, # 001) were extracted and cultured for 1h in complete DMEM supplemented with 2% Penicillin/Streptomycin. All wells containing UM-SCC-29 or blank were then washed once with blank DMEM; DMEM supplemented with 0.5% FBS was subsequently added to all wells. Cell culture transwell inserts with pore size of  $0.4 \mu\text{m}$  (Falcon, # 353095) were added to the wells and filled with  $300 \mu\text{l}$  of blank DMEM. DRGs were then transferred to the inserts (2 DRGs per insert). Each group received 2 cervical, 4 thoracic and 2 lumbar DRGs. After 24, 48 and 72h, 8 DRGs from each group were pooled, lysed in Qiazol (QIAGEN, #79306) and homogenized using a rotor (Omni International, # TH01) and QiaShredder columns (Qiagen, # 79654).

RNA was extracted with the miRNA extraction kit (QIAGEN, #217004) and converted to cDNA. qPCR was performed using SybrGreen Mastermix (Applied Biosystems, #4309155). Primers are listed in Supplementary Table S2.

### **Tissue analysis for myelin basic protein**

Sections from the same 8 samples used to perform the spatial transcriptomic assessment were stained for MBP as previously described in the immunohistochemistry section. Parameters to classify nerves into close to tumor or far from tumor were also the same used in the GeoMx analysis. Using digital images from tissue slides and the Halo platform, MBP staining intensity and proportion were quantified. Intensity was scored as zero for no stain, 1 for weak, 2 for moderate, and 3 for strong intensity stain. Proportion was scored as zero for no nerve fibers stained, 1 for one to 25%, 2 for 26 to 50%, and 3 for over 50% of nerve fibers presenting stain. A combined score was obtained by multiplying intensity versus proportion.

## Supplementary Figures

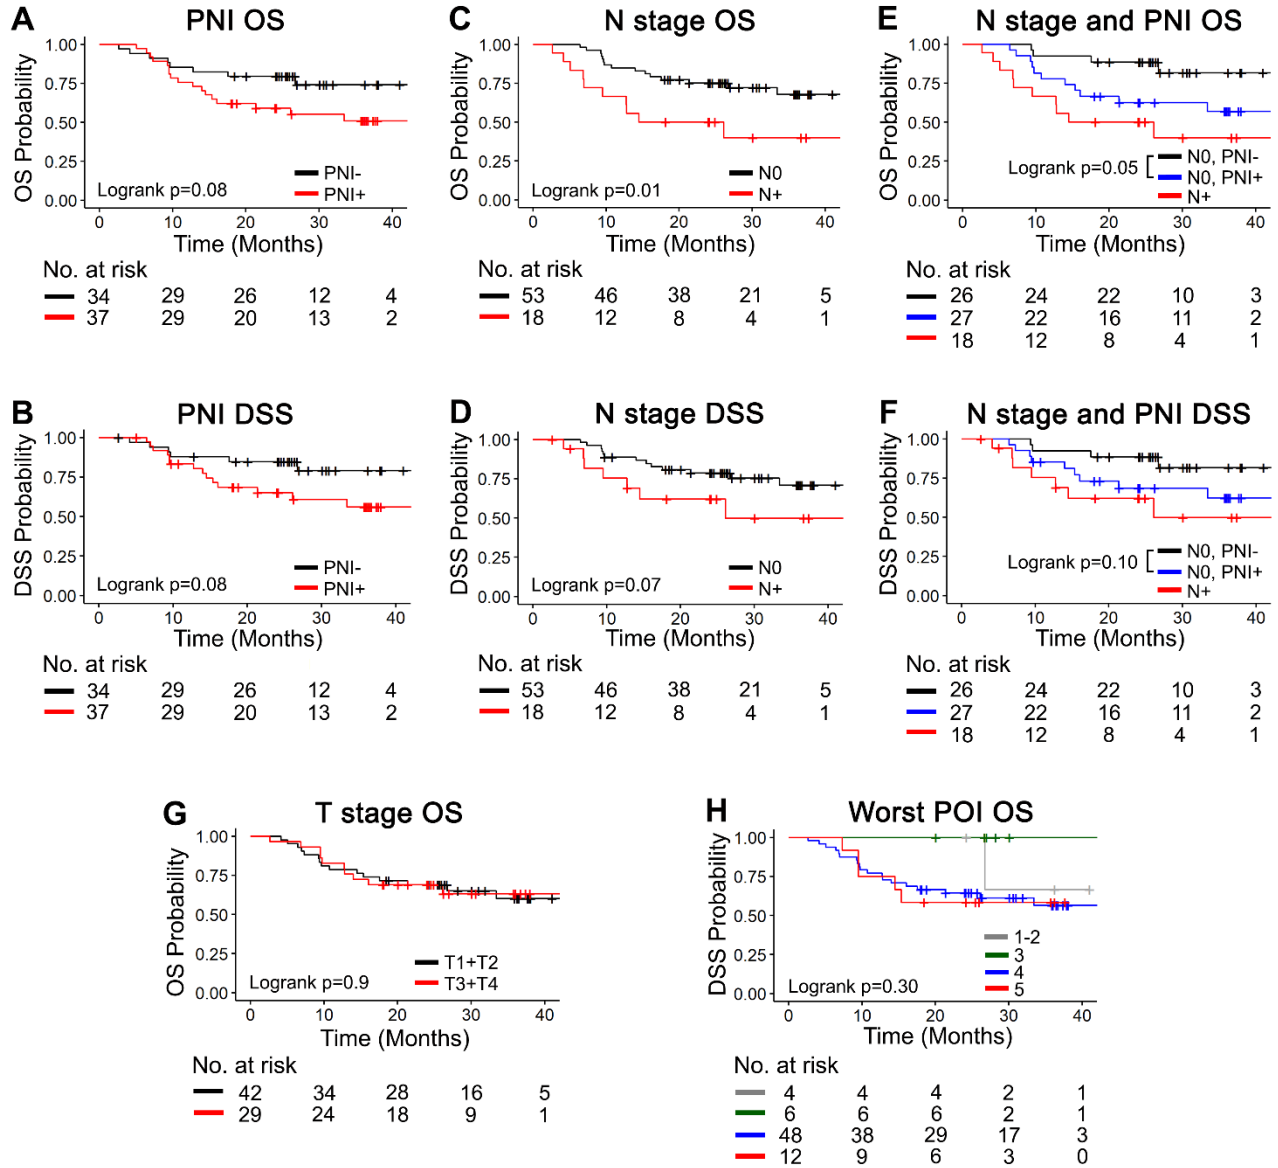

**Supplementary Figure 1:** Kaplan-Meier plots for OS and DSS related to PNI and other tumor characteristics for cohort 2 patients (n=71). **A** and **B**, PNI status. **C** and **D**, Lymph node metastasis clinical status. **E** and **F**, Node-negative patients stratified by PNI status. **G**, Tumor stage with patients stratified as T1+T2 and T3+T4. **H**, Worst pattern of invasion (POI). The number of patients at risk for each group at each time point is shown below the plots. PNI was assessed using H&E + IHC.

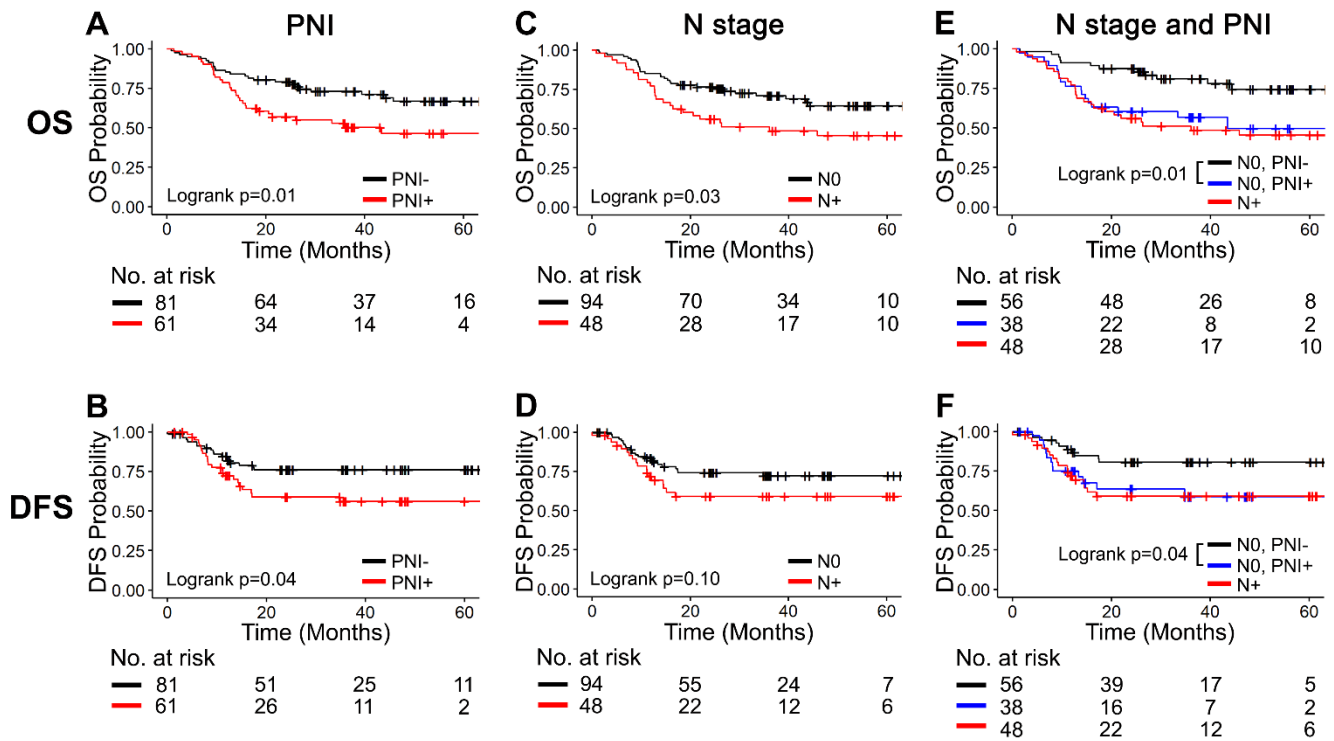

**Supplementary Figure 2:** Kaplan-Meier plots for OS and DFS related to PNI and N stage (n=142 patients). **A** and **B**, PNI status. **C** and **D**, Lymph node metastasis clinical status. **E** and **F**, Node-negative patients stratified by PNI status. The number of patients at risk for each group at each time point is shown below the plots. PNI was assessed using H&E + IHC.

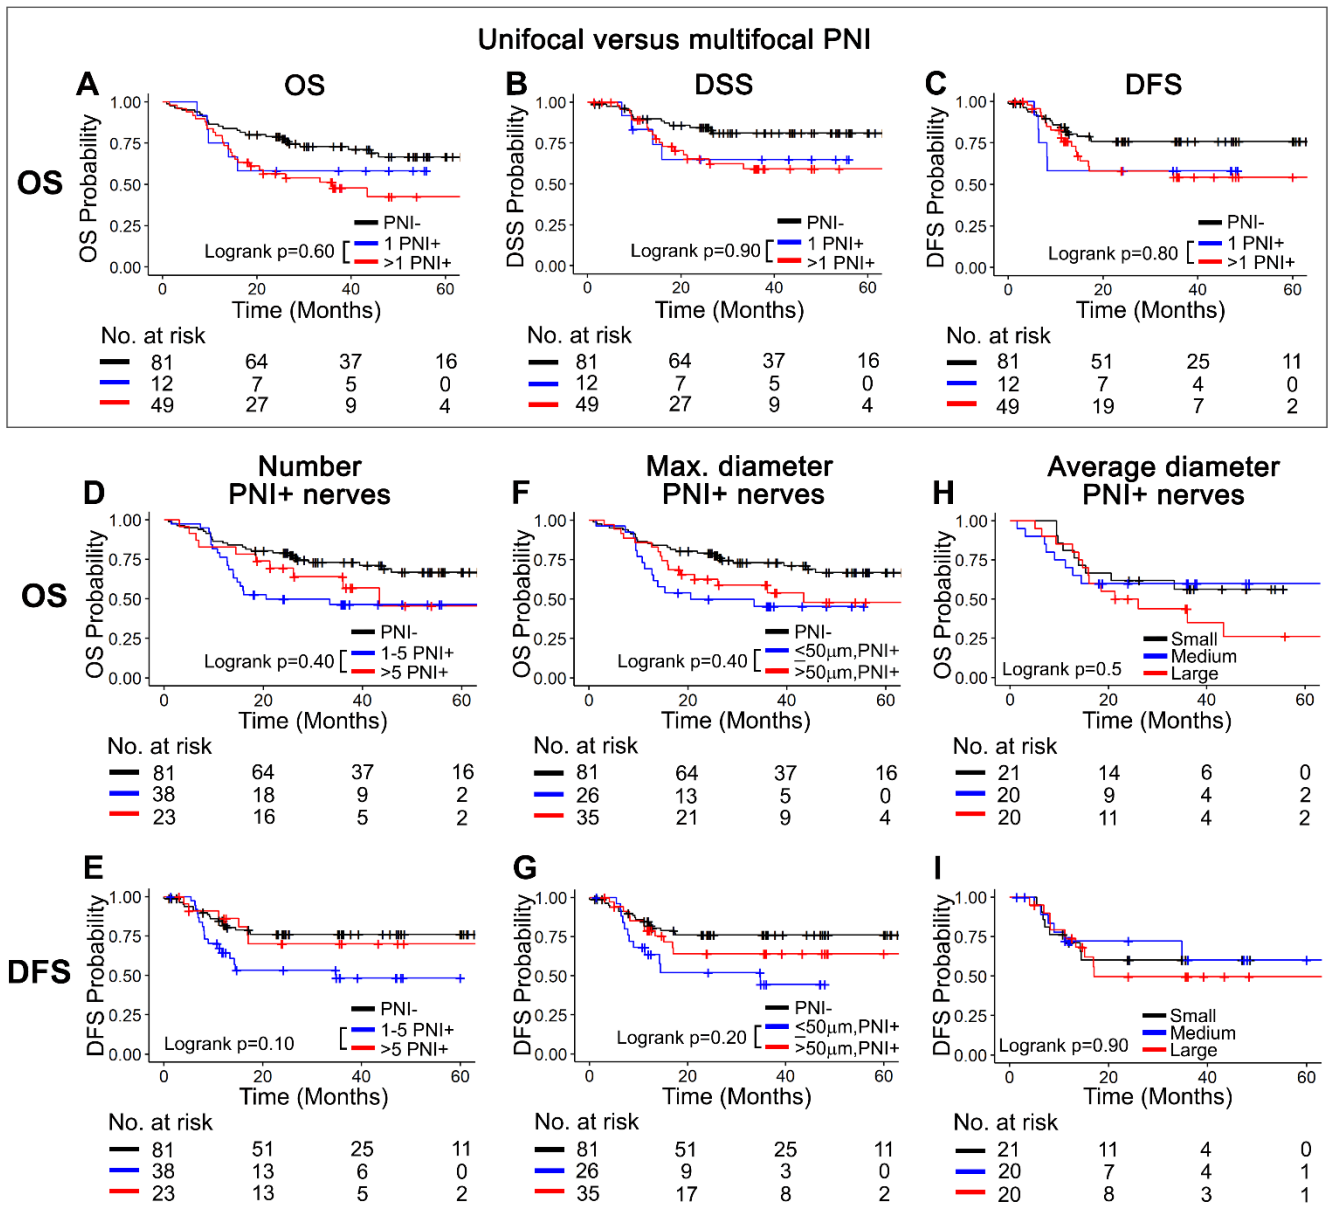

**Supplementary Figure 3:** Kaplan-Meier plots for OS, DSS, and DFS related to PNI-positive nerve characteristics (n=142 patients). **A, B,** and **C**, PNI status as unifocal (one PNI-positive nerve per patient) versus multifocal (more than one PNI-positive nerve per patient). **D** and **E**, Number of PNI-positive nerves per patient with a cut-off of five PNI-positive nerves. **F** and **G**, Maximum nerve diameter of PNI-positive nerves per patient; a cutoff of 50  $\mu\text{m}$  was calculated using regression tree analysis. **H** and **I**, Average diameter of PNI-positive nerves per patient, stratifying patients into small (diameter < 29.2  $\mu\text{m}$ ), medium (29.2 - 47.5  $\mu\text{m}$ ) and large (> 47.5  $\mu\text{m}$ ) nerve diameter. The number of patients at risk for each group at each time point is shown below the plots. PNI was assessed using H&E + IHC.

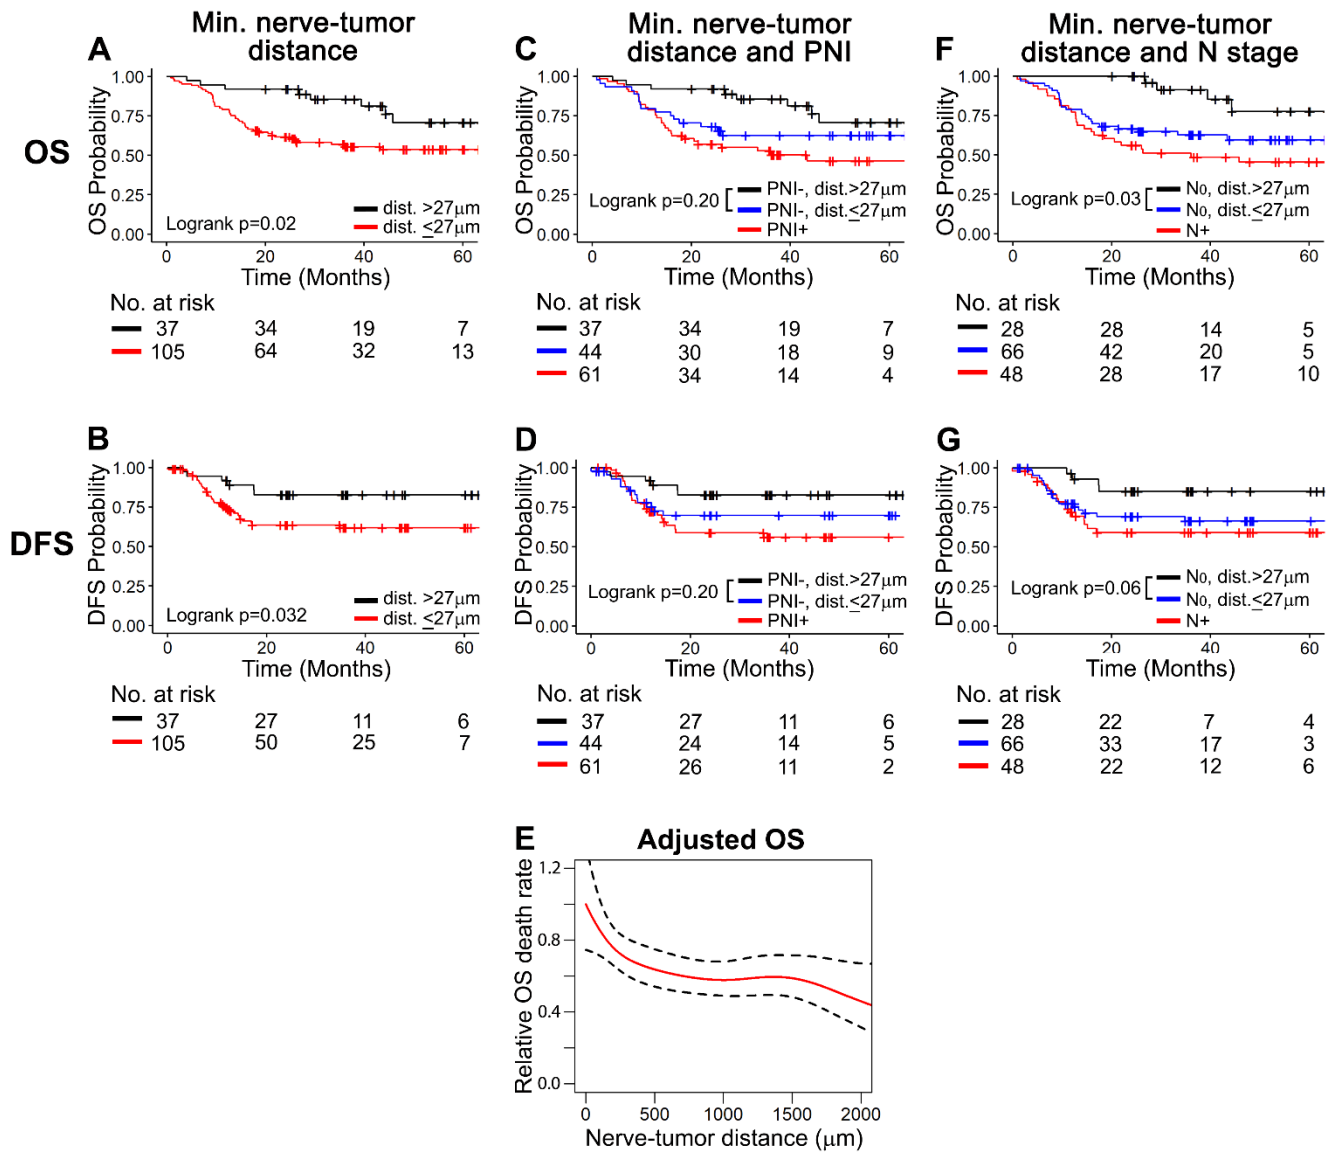

**Supplementary Figure 4:** Nerve tumor distance and survival (n=142 patients). **A** and **B**, Kaplan-Meier plots for OS and DFS stratifying patients based on minimum nerve-tumor distance of 27  $\mu$ m. **C** and **D**, Kaplan-Meier plots for OS and DFS with PNI-negative patients stratified by minimum nerve-tumor distance of 27  $\mu$ m. **E**, Adjusted Cox Additive modeling of nerve-level data weighted by number of nerves per patient and adjusted for age, ACE comorbidities, and tumor differentiation. Data is plotted as relative OS death rate as a function of nerve-tumor distance. **F** and **G**, Kaplan-Meier plots for OS and DFS with node-negative patients stratified by minimum nerve-tumor distance of 27  $\mu$ m. The number of patients at risk for each group at each time point is shown below the plots. PNI was assessed using H&E + IHC.

**A AJCC Stage re-classification**

| Stage<br>(AJCC 7 <sup>th</sup><br>Edition) | Stage<br>(AJCC 8 <sup>th</sup> Edition) |           |           |           |           | Total      |
|--------------------------------------------|-----------------------------------------|-----------|-----------|-----------|-----------|------------|
|                                            | NA                                      | I         | II        | III       | IV        |            |
| I                                          | 1                                       | 11        | 8         | 0         | 1         | <b>21</b>  |
| II                                         | 1                                       | 7         | 13        | 10        | 9         | <b>40</b>  |
| III                                        | 0                                       | 2         | 1         | 5         | 10        | <b>18</b>  |
| IV                                         | 0                                       | 0         | 2         | 11        | 50        | <b>63</b>  |
| <b>Total</b>                               | <b>2</b>                                | <b>20</b> | <b>24</b> | <b>26</b> | <b>70</b> | <b>142</b> |

**B AJCC 8th Edition stage frequency**

| T       | Frequency | Percent |
|---------|-----------|---------|
| 1       | 24        | 16.90   |
| 2       | 43        | 30.28   |
| 3       | 37        | 26.05   |
| 4       | 36        | 25.35   |
| Missing | 2         | 1.41    |

  

| N       | Frequency | Percent |
|---------|-----------|---------|
| 0       | 71        | 50.00   |
| 1       | 8         | 5.63    |
| 2a      | 11        | 7.75    |
| 2b      | 12        | 8.45    |
| 2c      | 2         | 1.41    |
| 3b      | 25        | 17.60   |
| Missing | 13        | 9.15    |

  

| Stage   | Frequency | Percent |
|---------|-----------|---------|
| I       | 20        | 14.08   |
| II      | 24        | 16.90   |
| III     | 26        | 18.31   |
| IV      | 70        | 49.29   |
| Missing | 2         | 1.41    |

**C AJCC 8th edition update from Figure 2C:  
Univariate Cox modeling for DSS**

| Stage<br>AJCC 8 <sup>th</sup> Edition | Hazard Ratio [CI]           | P value      |
|---------------------------------------|-----------------------------|--------------|
| I                                     | 0.000 *                     | 0.984        |
| II                                    | 0.497 [0.204, 1.209]        | 0.123        |
| III                                   | <b>0.214 [0.065, 0.709]</b> | <b>0.012</b> |
| IV                                    | ref.                        |              |

\* Hazard ratio and confidence interval not estimable  
ref. indicates the reference variable  
Values in bold indicate significance at the 0.05 level

**D AJCC 8th edition update from Figure 3C:  
Adjusted Weighted Cox modeling of all nerves**

| Variable                                       | Hazard Ratio | P value       |
|------------------------------------------------|--------------|---------------|
| Log(Nerve-tumor distance)                      | <b>0.90</b>  | <b>0.02</b>   |
| AJCC 8 <sup>th</sup> Edition Stage IV vs lower | <b>3.79</b>  | <b>0.0004</b> |
| Well differentiated vs others                  | 0.53         | 0.09          |
| Comorbidities                                  | 1.23         | 0.22          |

Values in bold indicate significance at the 0.05 level

**F AJCC 8th edition update from Figure 4C:  
Adjusted Weighted Cox modeling of nerves  
in the tumor bulk**

| Variable                                       | Hazard Ratio | P value      |
|------------------------------------------------|--------------|--------------|
| Log(Nerve Diameter)                            | <b>2.63</b>  | <b>0.01</b>  |
| AJCC 8 <sup>th</sup> Edition Stage IV vs lower | <b>3.02</b>  | <b>0.003</b> |
| Well differentiated vs others                  | 0.47         | 0.04         |
| Comorbidities                                  | 1.32         | 0.15         |

Values in bold indicate significance at the 0.05 level

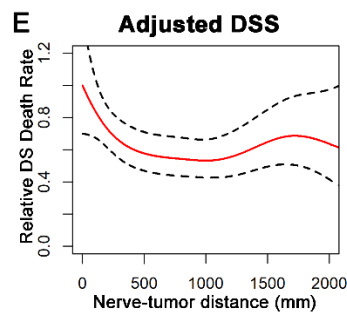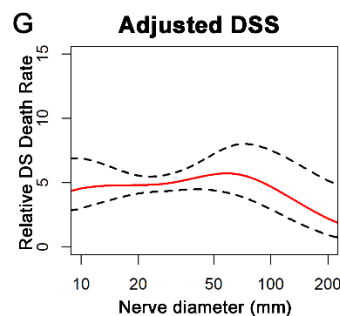

**Supplementary Figure 5:** Re-staging of 142 patients according to AJCC 8<sup>th</sup> edition. **A**, Comparison between 7<sup>th</sup> and 8<sup>th</sup> edition AJCC staging; 2 patients with non-available information were excluded from all subsequent analyses using AJCC 8<sup>th</sup> edition. **B**, Updated pathologic T, N and stage frequencies from 142 patients. **C**, Univariate Cox modeling using AJCC 8<sup>th</sup> edition and with DSS as outcome. **D**, Adjusted Weighted Cox modeling of all nerves in 140 samples. **E**, Adjusted Cox Additive modeling of nerve-level data weighted by number of nerves per patient and adjusted for AJCC 8<sup>th</sup> edition stage and differentiation status. Data are plotted as relative DSS death rate as a function of nerve-tumor distance. **F**, Adjusted Weighted Cox modeling of all nerves in 140 samples. **G**, Adjusted Cox Additive modeling of nerve-level data weighted by number of nerves per patient and adjusted for AJCC 8<sup>th</sup> edition stage and differentiation status. Data is plotted as relative DSS death rate as a function of nerve diameter.

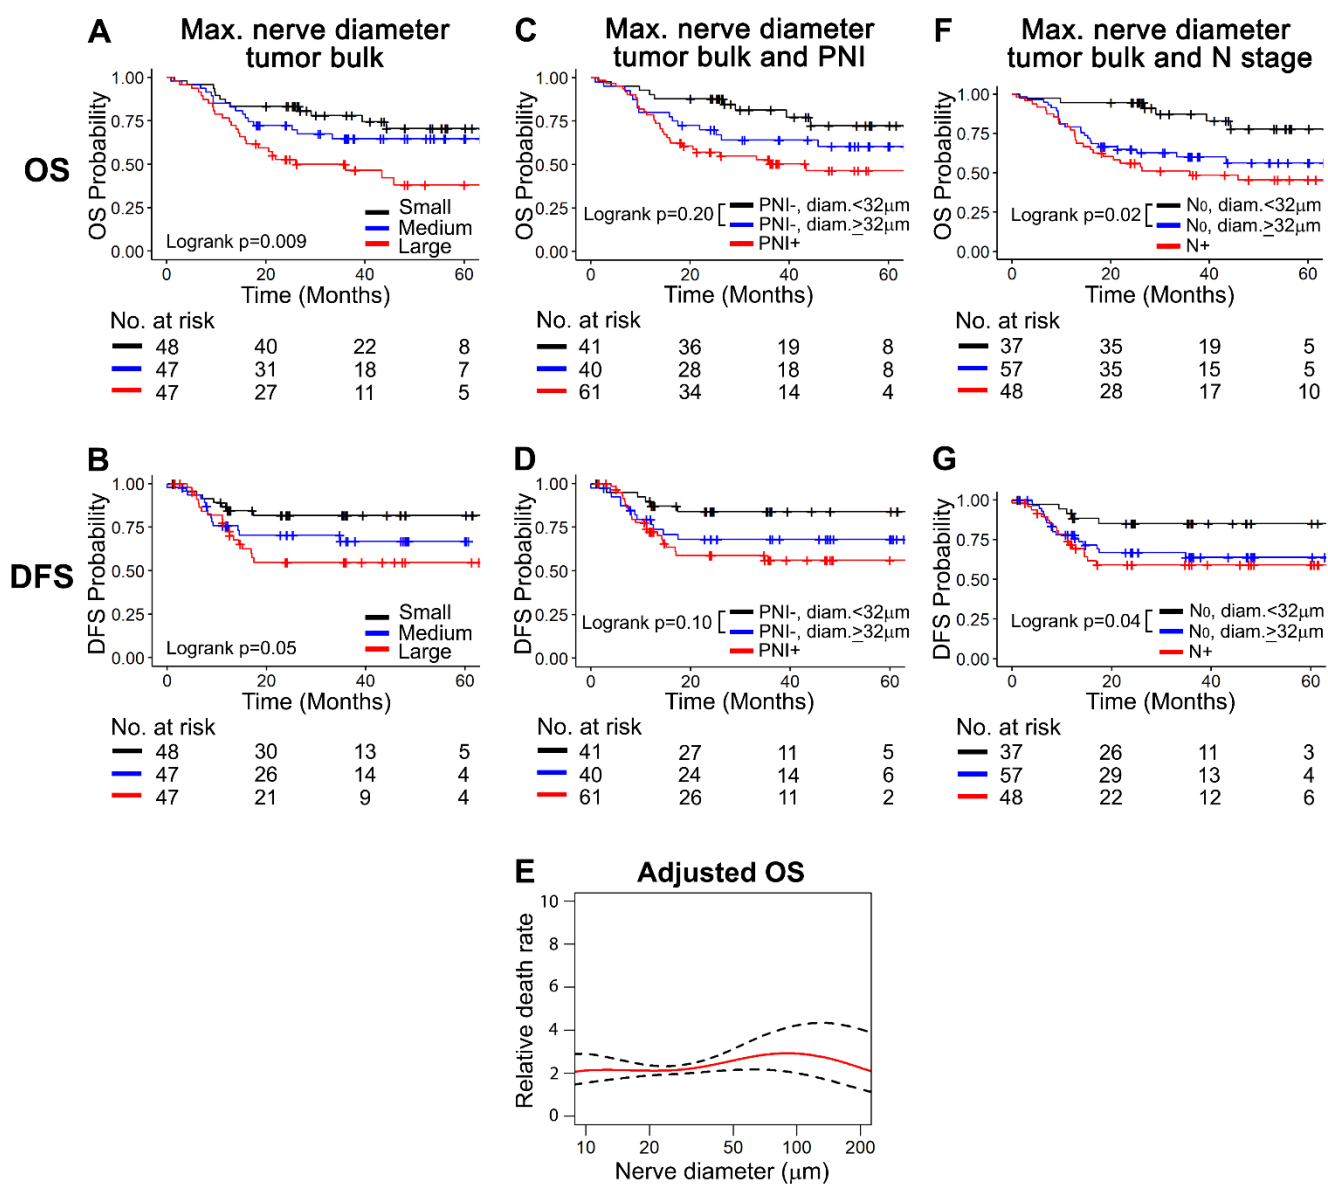

**Supplementary Figure 6:** Association of nerve diameter in tumor bulk with survival (n=142 patients). **A** and **B**, Kaplan-Meier plots for OS and DFS stratifying patients based on maximum nerve diameter in tumor bulk per patient. Patients are split into tertiles of nerve diameter in tumor bulk. **C** and **D**, Kaplan-Meier plots for OS and DFS with PNI-negative patients stratified by a maximum nerve diameter in the tumor bulk of 32  $\mu$ m. **E**, Adjusted Cox Additive modeling of nerve-level data weighted by the number of nerves per patient and adjusted for age, ACE comorbidities and tumor differentiation status. Data are plotted as relative OS death rates as a function of nerve diameter in tumor bulk. **F** and **G**, Kaplan-Meier plots for OS and DFS with node-negative patients stratified by maximum nerve diameter in tumor bulk of 32  $\mu$ m. The number of patients at risk for each group at each time point is shown below the plots. PNI is assessed using H&E + IHC.



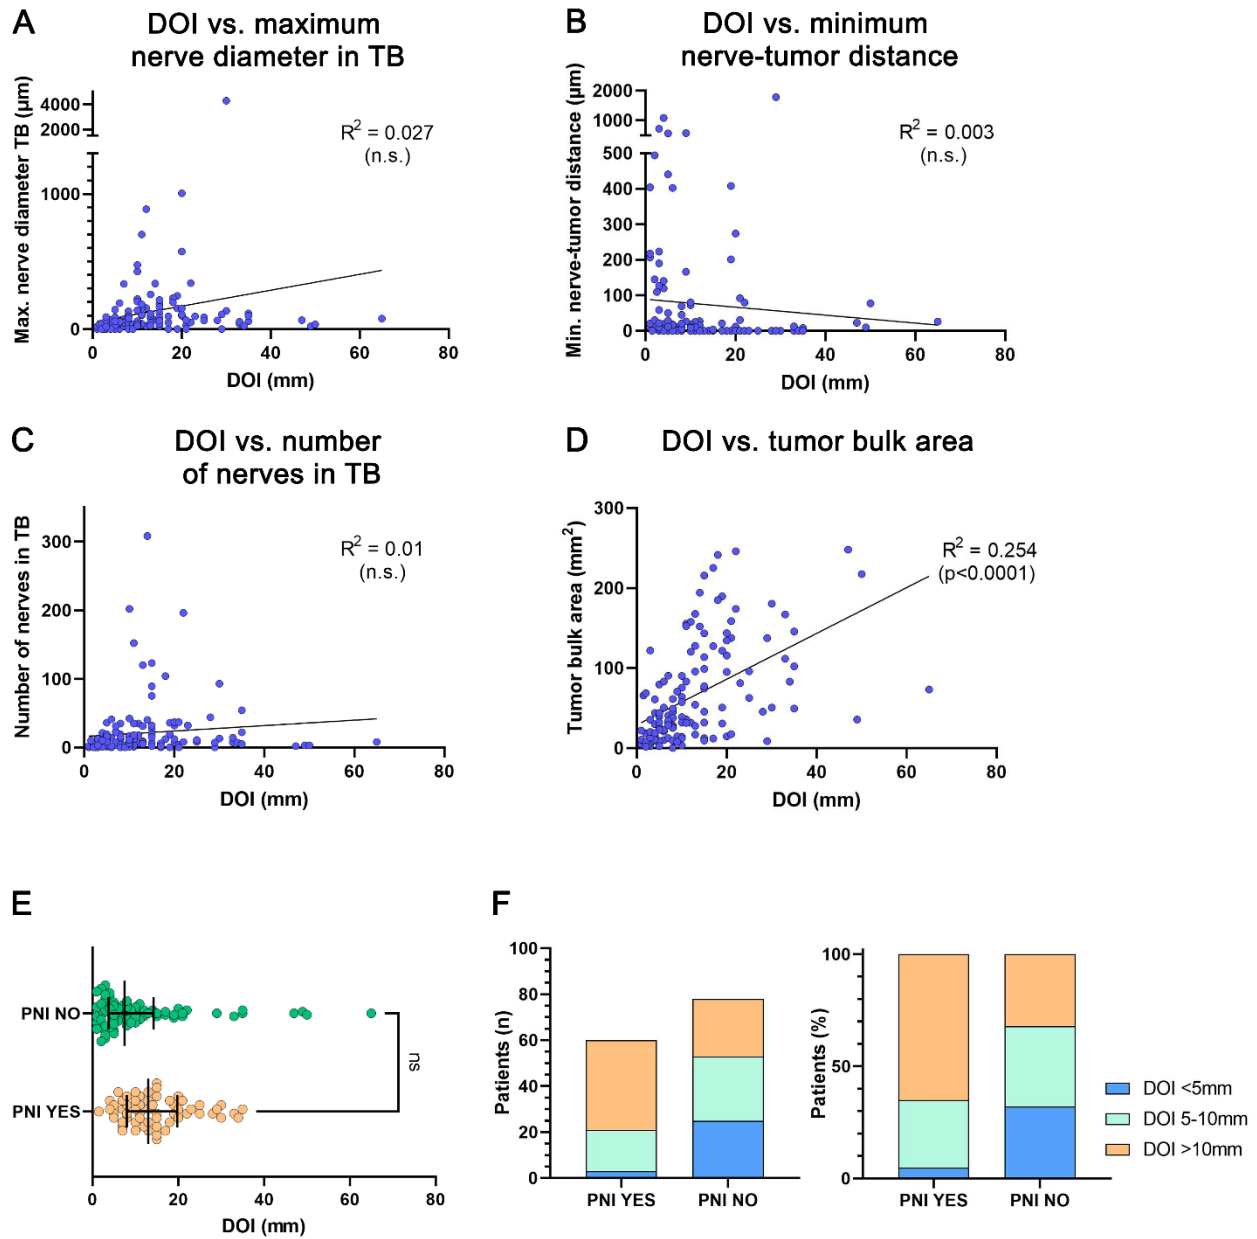

**Supplementary Figure 7:** Correlation between depth of invasion (DOI) and nerve-related parameters. **A**, **B**, and **C**, Correlation between DOI and nerve-related characteristics: maximum nerve diameter in tumor bulk, minimum nerve-tumor distance and number of nerves in tumor bulk. **D**, Correlation between DOI and tumor bulk area. Pearson's correlation with significance level at  $p < 0.05$  was used for **A**, **B**, **C** and **D**. **E**, DOI of PNI-positive and PNI-negative patients; no significant difference between groups (t test). **F**, PNI-positive and PNI-negative patients' frequencies in three thresholds of DOI; left graph shows number of patients and right graph shows percentage of patients in each group. All data is from 138 patients with available DOI information in pathology reports. PNI is assessed using H&E + IHC.

### A Ribosome (KEGG: 03010)

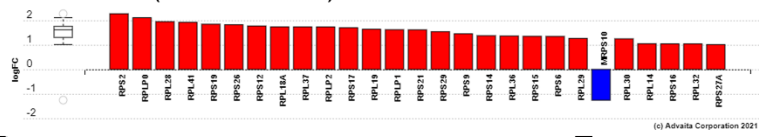

### B Metabolic Pathways (KEGG: 01100)

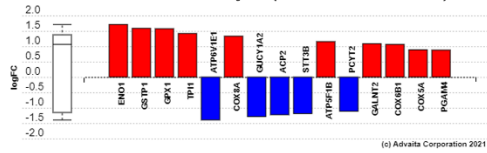

### E Neurodegeneration - multiple diseases (KEGG: 05022)

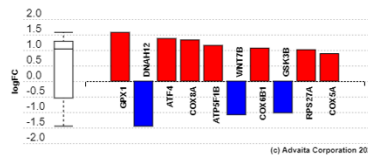

### C Alcoholism (KEGG: 05034)

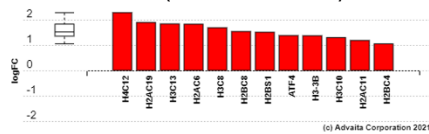

### F Amyotrophic Lateral Sclerosis (KEGG: 05014)

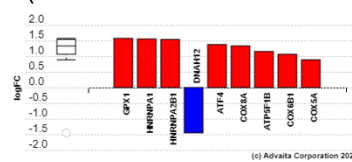

### D Systemic Lupus Erythematosus (KEGG: 05322)

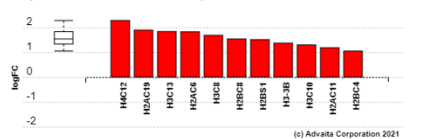

### H Biological Process

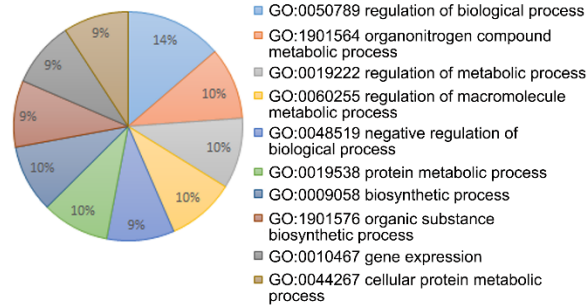

### G Molecular Function

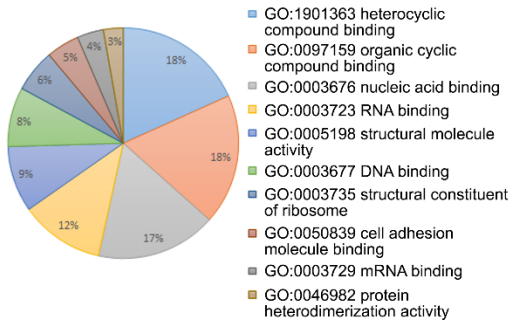

### I Cellular Component

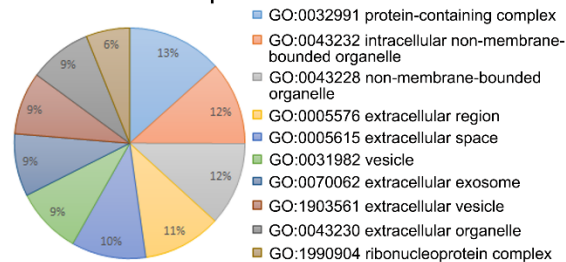

**Supplementary Figure 8: iPathway guide analysis of 159 DEGs in NC vs NF. A through F, Top 6 pathways ordered by gene representation. Genes in red are upregulated and genes in blue are downregulated in NC. Pathways Ribosome (A), Alcoholism (C), and Systemic Lupus Erythematosus (D) were significant at FDR < 0.05. G, Top 10 gene ontology (GO) terms for molecular function. H, Top 10 GO terms for biological process. I, Top 10 GO terms for cellular component. All GO terms in G, H, and I are significant at FDR < 0.05.**

## Supplementary Tables

**Table S1:** Descriptive statistics for OS, DSS, and DFS

|                                        | Cohort 1<br>(n=71) <sup>¶</sup> | Cohort 2<br>(n=71) | Combined<br>(N=142) |
|----------------------------------------|---------------------------------|--------------------|---------------------|
| <b>Overall Survival (OS)</b>           |                                 |                    |                     |
| Number of events, N (%)                | 30 (42.2)                       | 25 (35.2)          | 55 (38.7)           |
| 3-year OS probability                  | 0.66 (0.56, 0.78)               | 0.60 (0.48, 0.75)  | 0.64 (0.56, 0.73)   |
| Median follow-up time (months)         | 56.2 (53.9, 61.6)               | 30.1 (25.7, 35.7)  | 48.0 (38.0, 53.7)   |
| <b>Disease Free Survival (DFS)</b>     |                                 |                    |                     |
| Number of events, N (%)                | 18 (25.3)                       | 23 (32.4)          | 41 (29.6)           |
| 3-year DFS probability                 | 0.72 (0.62, 0.84)               | 0.62 (0.50, 0.77)  | 0.69 (0.60, 0.77)   |
| Median follow-up time (months)         | 47.5 (44.3, 48.1)               | 24.1 (24.0, 34.9)  | 35.6 (24.7, 39.3)   |
| <b>Disease Specific Survival (DSS)</b> |                                 |                    |                     |
| Number of events, N (%)                | 15 (19.7)                       | 20 (28.2)          | 35 (24.6)           |
| 3-year DSS probability                 | 0.77 (0.67, 0.88)               | 0.66 (0.55, 0.81)  | 0.73 (0.65, 0.81)   |
| Median follow-up time (months)         | 57.0 (48.6, 56.3)               | 27.0 (24.9, 31.0)  | 39.5 (36.2, 48.0)   |

<sup>¶</sup>Schmid et al., 2018

The median survival probability for OS, DFS, and DSS is not estimable

**Table S2:** Primer sequences

| Gene           | Species | Forward                | Reverse                 | Product size (bp) |
|----------------|---------|------------------------|-------------------------|-------------------|
| <i>Cfl1</i>    | Rat     | AGGAGATTCTGGTAGGAGATGT | GGTCTCATAGGTTGCGTCATAG  | 116               |
| <i>Marcks</i>  | Rat     | TGGGTCTTTCCCACTTTAACC  | CCCATTTCAGTTGAGTGCTACTA | 90                |
| <i>Fabp5</i>   | Rat     | AGAAGTGGGAAGGGAAAGAAAG | GTACCTTCTCATAGACCCGAGTA | 111               |
| <i>Hnrnpa1</i> | Rat     | ACTCTGAAGCCATCTTGGTAAA | CCACCCAAGCAACCATAAATAAA | 103               |
| <i>Gstp1</i>   | Rat     | GAGACCTCACCCTTTACCAATC | CTCCTTCTGGTCTTTCCATAAA  | 83                |
| <i>Cox5a</i>   | Rat     | GAGGGCATGTAGACGGTTAAA  | CCTTATGAGGTCCTGCTTTGT   | 83                |
| <i>Pdcd2</i>   | Rat     | GCATCGGGTACACAGAAGAA   | GAGGTAGTGAGGCATAAGGAAC  | 104               |
| <i>Anxa2</i>   | Rat     | GGCAGAGGATGGTTCTGTTATT | GACATCGGTTCCCTTCTCTTC   | 94                |
| <i>Mbp</i>     | Rat     | CCTGTCCCTCAGCAGATTTAG  | TCCCTTGTGAGCCGATTTATAG  | 97                |

bp – base pairs

**Table S3:** Relationship between PNI (assessed by H&E + IHC) and other variables (Unadjusted logistic regression of PNI status)

| Predictor                                  | OR, [95% CI]              |
|--------------------------------------------|---------------------------|
| Age                                        | 1.01 [0.98, 1.03]         |
| Tumor Stage (AJCC 7 <sup>th</sup> Edition) |                           |
| I                                          | ref.                      |
| II                                         | 3.14 [0.89, 11.04]        |
| III                                        | <b>5.31 [1.27, 22.24]</b> |
| IV                                         | <b>3.86 [1.17, 12.78]</b> |
| T Stage                                    |                           |
| 1                                          | ref.                      |
| 2                                          | 2.64 [0.85, 8.20]         |
| 3                                          | <b>5.14 [1.29, 20.52]</b> |
| 4                                          | <b>3.32 [1.07, 10.34]</b> |
| N Stage                                    |                           |
| N <sub>0</sub>                             | ref.                      |
| N+                                         | 1.36 [0.67, 2.73]         |
| Differentiation                            |                           |
| Poor                                       | 0.26 [0.07, 1.01]         |
| Moderate                                   | ref.                      |
| Well                                       | 0.62 [0.31, 1.24]         |
| Worst POI <sup>Φ</sup>                     |                           |
| 1-2                                        | ref.                      |
| 3                                          | 2.08 [0.62, 6.94]         |
| 4-5                                        | <b>2.81 [1.09, 7.26]</b>  |

<sup>Φ</sup> Worst pattern of invasion according to Brandwein-Gensler et al., 2005.

Values in bold indicate significance at the 0.05 level.

ref. indicates the reference variable

**Table S4:** Unadjusted Cox modeling of patient characteristics (n=142).

| Parameter                                 | Unit or group                 | OS                        |              | DFS                      |              | DSS                       |              |
|-------------------------------------------|-------------------------------|---------------------------|--------------|--------------------------|--------------|---------------------------|--------------|
|                                           |                               | HR [95% CI]               | p            | HR [95% CI]              | p            | HR [95% CI]               | p            |
| Age                                       | 1 year                        | 1.01 [0, 1.03]            | 0.541        | 0.99 [0.97, 1.02]        | 0.530        | 0.98 [0.96, 1.01]         | 0.176        |
| ACE Comorbidities                         | None                          | ref.                      |              | ref.                     |              | ref.                      |              |
|                                           | Mild                          | 1.83 [0.83, 4.06]         | 0.135        | 1.16 [0.53, 2.57]        | 0.710        | 0.98 [0.42, 2.31]         | 0.963        |
|                                           | Moderate                      | <b>2.51 [1.00, 6.26]</b>  | <b>0.049</b> | 1.21 [0.45, 3.26]        | 0.702        | 1.45 [0.53, 4.01]         | 0.472        |
|                                           | Severe                        | <b>4.77 [1.87, 12.18]</b> | <b>0.001</b> | 2.22 [0.79, 6.23]        | 0.132        | 2.15 [0.70, 6.60]         | 0.179        |
| T stage                                   | 1 or 2                        | ref.                      |              | ref.                     |              | ref.                      |              |
|                                           | 3 or 4                        | 1.57 [0.92, 2.68]         | 0.097        | 1.26 [0.68, 2.33]        | 0.463        | 1.45 [0.74, 2.81]         | 0.277        |
| N stage                                   | N <sub>0</sub>                | ref.                      |              | ref.                     |              | ref.                      |              |
|                                           | N-positive                    | <b>1.81 [1.06, 3.08]</b>  | <b>0.029</b> | 1.66 [0.90, 3.08]        | 0.106        | <b>2.40 [1.24, 4.66]</b>  | <b>0.009</b> |
| AJCC Stage*                               | I                             | <b>0.29 [0.10, 0.82]</b>  | <b>0.02</b>  | 0.46 [0.16, 1.34]        | 0.15         | 0.34 [0.10, 1.14]         | 0.08         |
|                                           | II                            | <b>0.50 [0.26, 0.97]</b>  | <b>0.04</b>  | 0.55 [0.25, 1.17]        | 0.12         | 0.45 [0.19, 1.05]         | 0.07         |
|                                           | III                           | 0.53 [0.22, 1.26]         | 0.15         | 0.52 [0.18, 1.49]        | 0.22         | 0.58 [0.20, 1.70]         | 0.32         |
|                                           | IV                            | ref.                      |              | ref.                     |              | ref.                      |              |
| PNI                                       | No                            | ref.                      |              | ref.                     |              | ref.                      |              |
|                                           | Yes                           | <b>1.93 [1.13, 3.29]</b>  | <b>0.016</b> | <b>1.92 [1.04, 3.56]</b> | <b>0.039</b> | <b>2.33 [1.18, 4.58]</b>  | <b>0.014</b> |
| Expanded N stage                          | N <sub>0</sub> , PNI-negative | ref.                      |              | ref.                     |              | ref.                      |              |
|                                           | N <sub>0</sub> , PNI-positive | <b>2.45 [1.19, 5.06]</b>  | <b>0.015</b> | <b>2.36 [1.03, 5.38]</b> | <b>0.042</b> | <b>3.36 [1.24, 9.09]</b>  | <b>0.017</b> |
|                                           | N-positive                    | <b>2.72 [1.39, 5.33]</b>  | <b>0.004</b> | <b>2.47 [1.14, 5.35]</b> | <b>0.022</b> | <b>4.41 [1.75, 11.12]</b> | <b>0.002</b> |
| Differentiation                           | Moderate                      | ref.                      |              | ref.                     |              | ref.                      |              |
|                                           | Poor                          | 0.85 [0.35, 2.07]         | 0.726        | 1.08 [0.44, 2.66]        | 0.872        | 1.39 [0.55, 3.53]         | 0.487        |
|                                           | Well                          | 0.70 [0.40, 1.23]         | 0.217        | <b>0.47 [0.24, 0.93]</b> | <b>0.030</b> | 0.60 [0.28, 1.25]         | 0.170        |
| Worst POI <sup>Φ</sup>                    | 1 or 2                        | ref.                      |              | ref.                     |              | ref.                      |              |
|                                           | 3                             | 1.01 [0.39, 2.66]         | 0.979        | 0.35 [0.07, 1.63]        | 0.180        | 0.20 [0.02, 1.59]         | 0.127        |
|                                           | 4 or 5                        | 1.47 [0.73, 2.97]         | 0.279        | 1.44 [0.66, 3.15]        | 0.354        | 1.38 [0.60, 3.18]         | 0.447        |
| log(Minimum nerve-tumor distance)         |                               | <b>0.67 [0.49, 0.92]</b>  | <b>0.013</b> | <b>0.66 [0.46, 0.95]</b> | <b>0.026</b> | <b>0.56 [0.36, 0.85]</b>  | <b>0.007</b> |
| log(Average nerve-tumor distance)         |                               | <b>0.45 [0.29, 0.68]</b>  | <b>0.000</b> | <b>0.48 [0.30, 0.77]</b> | <b>0.002</b> | <b>0.41 [0.25, 0.66]</b>  | <b>0.000</b> |
| log(Maximum nerve diameter in tumor bulk) |                               | <b>1.48 [1.05, 2.09]</b>  | <b>0.025</b> | 1.47 [0.99, 2.17]        | 0.053        | <b>1.74 [1.11, 2.73]</b>  | <b>0.016</b> |
| log(Average nerve diameter in tumor bulk) |                               | <b>1.75 [1.06, 2.90]</b>  | <b>0.028</b> | 1.76 [0.99, 3.12]        | 0.053        | <b>2.22 [1.11, 4.44]</b>  | <b>0.025</b> |

\*American Joint Committee on Cancer (AJCC) TNM staging system 7<sup>th</sup> Edition.

<sup>Φ</sup> Worst pattern of invasion according to Brandwein-Gensler et al., 2005.

PNI was assessed using H&E + IHC

ref. indicates the reference variable

**Table S5:** Characteristics of 9137 nerves measured

| Nerve-related characteristic                      |             | Missing, N (%) |
|---------------------------------------------------|-------------|----------------|
| Nerve-Level PNI                                   | N (%)*      |                |
| No                                                | 8505 (93.1) | 225 (2.4)      |
| Yes                                               | 407 (4.5)   |                |
| Nerve location                                    | N (%)*      |                |
| Tumor margin                                      | 6156 (67%)  | 6 (<1)         |
| Tumor bulk                                        | 2975 (33%)  |                |
| Nerve diameter range ( $\mu\text{m}$ )            | 9-4708      |                |
| Nerve diameter median ( $\mu\text{m}$ )           | 25          |                |
| Nerve-tumor distance range ( $\mu\text{m}$ )      | 0-2089      |                |
| Nerve-tumor distance median ( $\mu\text{m}$ )     | 549         |                |
| Number of PNI-positive nerves per patient (range) | 0-36        |                |

\* Note: Percent includes NA values.

PNI was assessed using H&E + IHC

**Table S6:** Nerve-related characteristics of the sample

|                                                     | Cohort 1<br>(n=71) <sup>†</sup> <sup>Φ</sup> | Cohort 2 (n=71)                         | Combined (n=142)                        |
|-----------------------------------------------------|----------------------------------------------|-----------------------------------------|-----------------------------------------|
| Nerve and sample characteristics                    | N (%) <sup>*</sup> or Mean <sup>†</sup>      | N (%) <sup>*</sup> or Mean <sup>†</sup> | N (%) <sup>*</sup> or Mean <sup>†</sup> |
| Tumor bulk area ( $\text{mm}^2$ )                   | 71.79                                        | 58.96                                   | 65.37                                   |
| Margin Area ( $\text{mm}^2$ )                       | 31.50                                        | 47.31                                   | 39.41                                   |
| Missing                                             | 9 (12.7)                                     | 0 (0)                                   | 9 (6.3)                                 |
| Total area analyzed (bulk + margin, $\text{mm}^2$ ) | 103.29                                       | 106.27                                  | 104.78                                  |
| Number of nerves in total area                      | 40.6                                         | 88.1                                    | 64.4                                    |
| Number of nerves in tumor bulk                      | 16.8                                         | 24.9                                    | 20.9                                    |
| Number of nerves in tumor margin                    | 23.8                                         | 63.2                                    | 43.5                                    |
| Average nerve diameter ( $\mu\text{m}$ )            | 41.1                                         | 33.8                                    | 37.4                                    |
| Maximum nerve diameter ( $\mu\text{m}$ )            | 333.3                                        | 185.0                                   | 258.6                                   |
| Average nerve area ( $\mu\text{m}^2$ )              | 14,305.7                                     | 7,835.0                                 | 11,047.4                                |
| Maximum nerve area ( $\mu\text{m}^2$ )              | 317,163                                      | 188,318.3                               | 252,283.9                               |
| Average nerve-tumor distance ( $\mu\text{m}$ )      | 618.6                                        | 841.6                                   | 730.1                                   |
| Minimum nerve-tumor distance ( $\mu\text{m}$ )      | 77.3                                         | 72.8                                    | 75.1                                    |

<sup>†</sup> Schmitd et al., 2018.

<sup>Φ</sup> Cohort 1 has one patient with no nerves to evaluate.

<sup>†</sup> The mean values presented are the mean of the number, average, minimum and maximum values across patients.

\* Percent includes NA values.

**Table S7:** Adjusted Cox modeling of nerve-level data and survival

| Adjusted Weighted Cox modeling*                               | OS                       |              | DFS                      |             | DSS                      |              |
|---------------------------------------------------------------|--------------------------|--------------|--------------------------|-------------|--------------------------|--------------|
|                                                               | HR [95% CI]              | P-value      | HR [95% CI]              | P-value     | HR [95% CI]              | P-value      |
| <b>Model 1: All Nerves (n=9114<sup>a</sup>)</b>               |                          |              |                          |             |                          |              |
| Log(Nerve-tumor Distance)                                     | <b>0.88 (0.81, 0.95)</b> | <b>0.000</b> | 0.92 (0.84, 1.00)        | 0.05        | <b>0.87 (0.79, 0.96)</b> | <b>0.005</b> |
| AJCC Stage IV vs. lower <sup>Φ</sup>                          | <b>2.03 (1.17, 3.51)</b> | <b>0.01</b>  | 1.83 (0.98, 3.43)        | 0.06        | <b>2.07 (1.05, 4.05)</b> | <b>0.03</b>  |
| Well differentiated vs. others                                | 0.70 (0.41, 1.20)        | 0.19         | <b>0.42 (0.22, 0.82)</b> | <b>0.01</b> | 0.50 (0.25, 1.02)        | 0.06         |
| Comorbidities                                                 | <b>1.59 (1.21, 2.08)</b> | <b>0.000</b> | 1.22 (0.87, 1.73)        | 0.25        | 1.30 (0.87, 1.94)        | 0.19         |
| Age                                                           | 1.01 (0.98, 1.04)        | 0.49         |                          |             |                          |              |
| <b>Model 2: Nerves within Tumor Bulk (n=3000<sup>b</sup>)</b> |                          |              |                          |             |                          |              |
| Log(Nerve Diameter)                                           | <b>2.16 (1.13, 4.12)</b> | <b>0.02</b>  | <b>2.06 (1.07, 3.94)</b> | <b>0.03</b> | <b>2.50 (1.24, 5.06)</b> | <b>0.01</b>  |
| AJCC Stage IV vs. lower <sup>Φ</sup>                          | 1.47 (0.75, 2.88)        | 0.26         | 1.62 (0.72, 3.67)        | 0.24        | 1.80 (0.76, 4.23)        | 0.18         |
| Well differentiated vs. others                                | 0.72 (0.40, 1.27)        | 0.48         | <b>0.40 (0.17, 0.96)</b> | <b>0.04</b> | 0.48 (0.19, 1.20)        | 0.12         |
| Comorbidities                                                 | <b>1.63 (1.20, 2.23)</b> | <b>0.002</b> | 1.36 (0.92, 2.01)        | 0.13        | 1.41 (0.93, 2.15)        | 0.11         |
| Age                                                           | 1.01 (0.98, 1.04)        | 0.59         |                          |             |                          |              |

\* Weighted by the number of nerves within each subject.

<sup>a</sup> From 9137 nerves assessed in 142 patients (23 missing values).

<sup>Φ</sup> American Joint Committee on Cancer TNM staging system 7<sup>th</sup> Edition.

<sup>b</sup> 25 subjects with no nerves in tumor bulk were assigned 1 nerve with a diameter of zero  $\mu\text{m}$ .

**Table S8:** Adjusted Cox modeling of nerve diameter in the tumor bulk

| Parameter                                    | Unit or group                                        | OS                       |              | DFS                      |              | DSS                       |              |
|----------------------------------------------|------------------------------------------------------|--------------------------|--------------|--------------------------|--------------|---------------------------|--------------|
|                                              |                                                      | HR [95% CI]              | p            | HR [95% CI]              | p            | HR [95% CI]               | p            |
| Maximum nerve diameter in tumor bulk         | Small                                                | ref.                     |              | ref.                     |              | ref.                      |              |
|                                              | Medium                                               | 1.78 [0.82, 3.84]        | 0.142        | <b>3.33 [1.28, 8.67]</b> | <b>0.014</b> | <b>5.13 [1.63, 16.17]</b> | <b>0.005</b> |
|                                              | Large                                                | <b>2.55 [1.23, 5.31]</b> | <b>0.012</b> | <b>3.07 [1.2, 7.86]</b>  | <b>0.019</b> | <b>4.58 [1.45, 14.52]</b> | <b>0.010</b> |
| PNI and Maximum nerve diameter in tumor bulk | PNI-negative, nerve diameter <32 $\mu\text{m}$       | ref.                     |              | ref.                     |              | ref.                      |              |
|                                              | PNI-negative, nerve diameter $\geq$ 32 $\mu\text{m}$ | 1.54 [0.67, 3.51]        | 0.309        | 2.29 [0.83, 6.29]        | 0.109        | <b>3.73 [1.01, 13.8]</b>  | <b>0.049</b> |
|                                              | PNI-positive                                         | <b>2.74 [1.27, 5.9]</b>  | <b>0.010</b> | <b>3.47 [1.32, 9.16]</b> | <b>0.012</b> | <b>6.96 [1.96, 24.76]</b> | <b>0.003</b> |

DFS and DSS are adjusted for AJCC stage and comorbidities. OS is adjusted for AJCC stage, comorbidities, and age.

PNI was assessed using H&E + IHC

ref. indicates the reference variable

**Table S9:** differentially expressed genes in NC vs NF

| Top 50 upregulated in NC* |          |                  | Top 50 downregulated in NC* |          |                  |
|---------------------------|----------|------------------|-----------------------------|----------|------------------|
| Gene                      | Log2(FC) | Adjusted p-value | Gene                        | Log2(FC) | Adjusted p-value |
| <i>KRT5</i>               | 3.15     | 0.0842           | <i>MBP</i>                  | -2.41    | 0.0828           |
| <i>KRT6A</i>              | 2.79     | 0.0003           | <i>TCAP</i>                 | -1.83    | 0.0008           |
| <i>TMSB10</i>             | 2.51     | 0.0822           | <i>ACTA1</i>                | -1.80    | 0.0278           |
| <i>H4C12</i>              | 2.28     | 0.0043           | <i>REC114</i>               | -1.78    | 0.0392           |
| <i>RPS2</i>               | 2.27     | 0.0013           | <i>MME</i>                  | -1.75    | 0.0144           |
| <i>RPLP0</i>              | 2.11     | 0.0043           | <i>LCN12</i>                | -1.71    | 0.0122           |
| <i>DSP</i>                | 2.08     | 0.0357           | <i>CEP164</i>               | -1.68    | 0.0710           |
| <i>HI-5</i>               | 2.01     | 0.0230           | <i>A1BG</i>                 | -1.62    | 0.0009           |
| <i>CFL1</i>               | 2.01     | 0.0775           | <i>GDF7</i>                 | -1.53    | 0.0822           |
| <i>COL4A1</i>             | 2.00     | 0.0074           | <i>KLHL20</i>               | -1.52    | 0.0822           |
| <i>RPL28</i>              | 1.95     | 0.0842           | <i>ELL</i>                  | -1.50    | 0.0088           |
| <i>RPL41</i>              | 1.92     | 0.0003           | <i>PDCD2</i>                | -1.50    | 0.0036           |
| <i>S100A11</i>            | 1.92     | 0.0003           | <i>MYOZ1</i>                | -1.47    | 0.0003           |
| <i>H2AC19</i>             | 1.89     | 0.0081           | <i>FBXL2</i>                | -1.46    | 0.0671           |
| <i>RPS19</i>              | 1.85     | 0.0026           | <i>TRANK1</i>               | -1.46    | 0.0606           |
| <i>H3C13</i>              | 1.84     | 0.0183           | <i>SLC16A2</i>              | -1.46    | 0.0117           |
| <i>CD44</i>               | 1.82     | 0.0318           | <i>DNAH12</i>               | -1.45    | 0.0866           |
| <i>RPS26</i>              | 1.82     | 0.0632           | <i>RNF212</i>               | -1.44    | 0.0309           |
| <i>H2AC6</i>              | 1.82     | 0.0822           | <i>TTBK2</i>                | -1.42    | 0.0165           |
| <i>FABP5</i>              | 1.82     | 0.0042           | <i>MCRS1</i>                | -1.40    | 0.0318           |
| <i>MYL6</i>               | 1.81     | 0.0236           | <i>ATP6V1E1</i>             | -1.40    | 0.0435           |
| <i>COL3A1</i>             | 1.78     | 0.0331           | <i>CES4A</i>                | -1.38    | 0.0208           |
| <i>RPS12</i>              | 1.77     | 0.0309           | <i>KLK7</i>                 | -1.35    | 0.0463           |
| <i>RPL18A</i>             | 1.74     | 0.0643           | <i>OR2H2</i>                | -1.35    | 0.0405           |
| <i>RPL37</i>              | 1.74     | 0.0030           | <i>ATG5</i>                 | -1.34    | 0.0643           |
| <i>RPLP2</i>              | 1.74     | 0.0429           | <i>EPPK1</i>                | -1.33    | 0.0720           |
| <i>NPM1</i>               | 1.71     | 0.0059           | <i>ZBTB40</i>               | -1.32    | 0.0318           |
| <i>ENO1</i>               | 1.71     | 0.0175           | <i>R3HCC1L</i>              | -1.32    | 0.0842           |
| <i>RPS17</i>              | 1.70     | 0.0043           | <i>TAF1B</i>                | -1.31    | 0.0671           |
| <i>PTMA</i>               | 1.69     | 0.0589           | <i>KRBOX4</i>               | -1.31    | 0.0657           |
| <i>H3C8</i>               | 1.68     | 0.0055           | <i>GUCY1A2</i>              | -1.29    | 0.0885           |
| <i>ITGAV</i>              | 1.66     | 0.0309           | <i>UBAC1</i>                | -1.28    | 0.0649           |
| <i>RPL19</i>              | 1.64     | 0.0043           | <i>TGIF2</i>                | -1.28    | 0.0429           |
| <i>EMILIN1</i>            | 1.64     | 0.0435           | <i>CWF19L2</i>              | -1.27    | 0.0828           |
| <i>RPLP1</i>              | 1.62     | 0.0643           | <i>OTUD4</i>                | -1.26    | 0.0504           |
| <i>RPS21</i>              | 1.62     | 0.0529           | <i>MRPS10</i>               | -1.26    | 0.0671           |
| <i>GSTP1</i>              | 1.58     | 0.0117           | <i>HEPHL1</i>               | -1.25    | 0.0450           |
| <i>GPX1</i>               | 1.57     | 0.0135           | <i>PLPP7</i>                | -1.23    | 0.0806           |
| <i>TAGLN2</i>             | 1.57     | 0.0089           | <i>ACP2</i>                 | -1.23    | 0.0510           |
| <i>HNRNPA1</i>            | 1.55     | 0.0589           | <i>RASSF3</i>               | -1.22    | 0.0656           |
| <i>RPS29</i>              | 1.54     | 0.0806           | <i>STT3B</i>                | -1.19    | 0.0822           |
| <i>HNRNPA2</i>            | 1.54     | 0.0734           | <i>ICOS</i>                 | -1.18    | 0.0842           |
| <i>H2BC8</i>              | 1.53     | 0.0124           | <i>ZNF33B</i>               | -1.17    | 0.0376           |
| <i>HNRNPH1</i>            | 1.53     | 0.0572           | <i>ZNF577</i>               | -1.16    | 0.0292           |
| <i>H2BS1</i>              | 1.50     | 0.0178           | <i>ANAPC4</i>               | -1.15    | 0.0882           |
| <i>STAT2</i>              | 1.47     | 0.0713           | <i>CASR</i>                 | -1.15    | 0.0849           |
| <i>RPS9</i>               | 1.46     | 0.0043           | <i>GRHL3</i>                | -1.14    | 0.0708           |
| <i>EIF4A1</i>             | 1.44     | 0.0036           | <i>ITGB6</i>                | -1.14    | 0.0572           |
| <i>HDLBP</i>              | 1.42     | 0.0610           | <i>PCYT2</i>                | -1.11    | 0.0572           |
| <i>TPI1</i>               | 1.42     | 0.0987           | <i>MRPL58</i>               | -1.09    | 0.0888           |

\* Ordered by log2(Fold Change)
